# Supplementary material for: Facile and sustainable recovery of spent LiFePO4 battery cathode materials in a Ca(ClO)2 system
Source: Royal Society of Chemistry journal article supplement (doi:10.1039/d3gc04418a), 2024-01-01
Supplement: d3gc04418a1.pdf [file d3gc04418a1.pdf]

## Supporting information

### Facile and sustainable recovery of spent LiFePO<sub>4</sub> battery cathode materials in a Ca(ClO)<sub>2</sub> system

Gongqi Liu<sup>a,b</sup>, Zejian Liu<sup>a,b,c</sup>, Jing Gu<sup>a,b,c</sup>, Shujia Wang<sup>a</sup>, Yufeng Wu<sup>d</sup>\*, Haoran Yuan<sup>a,b,c</sup>\*, Yong Chen<sup>a,b</sup>

<sup>a</sup> *Guangzhou Institute of Energy Conversion, Chinese Academy of Sciences (CAS), Guangzhou 510640, PR China*

<sup>b</sup> *Guangdong Provincial Key Laboratory of New and Renewable Energy Research and Development, Guangzhou 510640, PR China*

<sup>c</sup> *School of Engineering Science, University of Science and Technology of China, Hefei, 230026, PR China*

<sup>d</sup> *Institute of Circular Economy, Beijing University of Technology, Beijing 100124, China*

6 pages, 3 tables, 3 figures, 1 test

---

\* Corresponding author at: Institute of Circular Economy, Beijing University of Technology, Beijing 100124, China.

E-mail address: wuyufeng3r@126.com (YF. Wu).

\* Corresponding author at: Guangzhou Institute of Energy Conversion, Chinese Academy of Sciences (CAS), Guangzhou 510640, China.

E-mail address: yuanhr@ms.giec.ac.cn (HR. Yuan).

## Contents

Figure S1. XPS spectra of (a) Ca 2p, and (b) C 1s for activated materials and leached residue (mass ratio of  $\text{Ca}(\text{ClO})_2/\text{LiFePO}_4=1.4$  g/g, 400 rpm and 30 min)

Figure S2. XPS spectra of (a) P 2p, and (b) O 1s for activated materials and leached residue (mass ratio of  $\text{Ca}(\text{ClO})_2/\text{LiFePO}_4=1.2$  g/g, 400 rpm and 30 min)

Figure S3. The benefits of recovering 1.0 kg spent  $\text{LiFePO}_4$  batteries in the persulfate system

Table S1. Main components of SLFPB-Ms (wt.%)

Table S2. Purity of the  $\text{LiCl}$  standards and the products in our study

Table S3. Unit prices of the main chemical reagents/products

Text S1. Economic analysis and detailed information

**Table S1**

Table S1. Main components of SLFPB-Ms (wt.%).

| Elements | Fe    | p     | Li   | Al   | Cu   | F    | C     |
|----------|-------|-------|------|------|------|------|-------|
| Content  | 28.63 | 19.55 | 3.91 | 0.09 | 0.08 | 0.37 | 15.01 |

Notes: The content of F was determined by a fluoride ion selective electrode (ISE, PXSJ-216 F, INESA Scientific Instrument), and content of C in the sample was examined by a carbon-sulfur analyzer (CS-2800 G, NCS Testing Technology Co., Ltd.).

**Figure S1**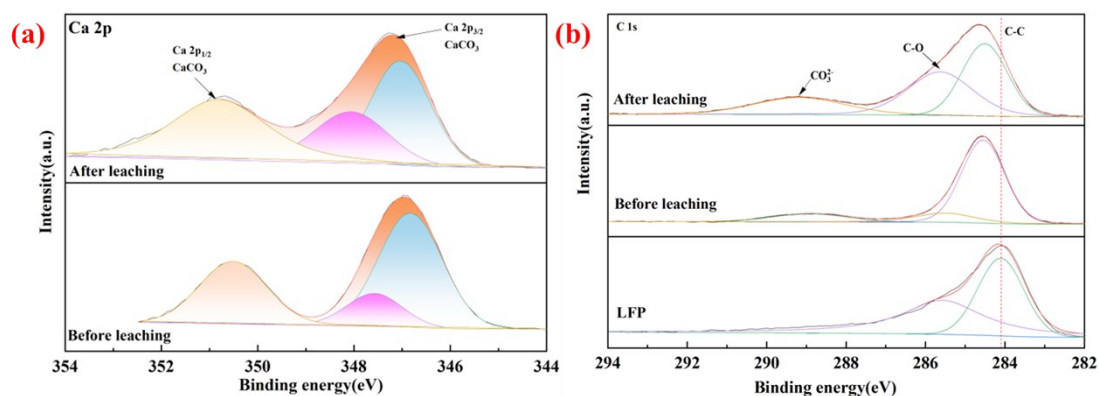

Figure S1. XPS spectra of (a) Ca 2p, and (b) C 1s for activated materials and leached residue (mass ratio of Ca(ClO)<sub>2</sub>/LiFePO<sub>4</sub>=1.4 g/g, 400 rpm and 30 min)

**Figure S2**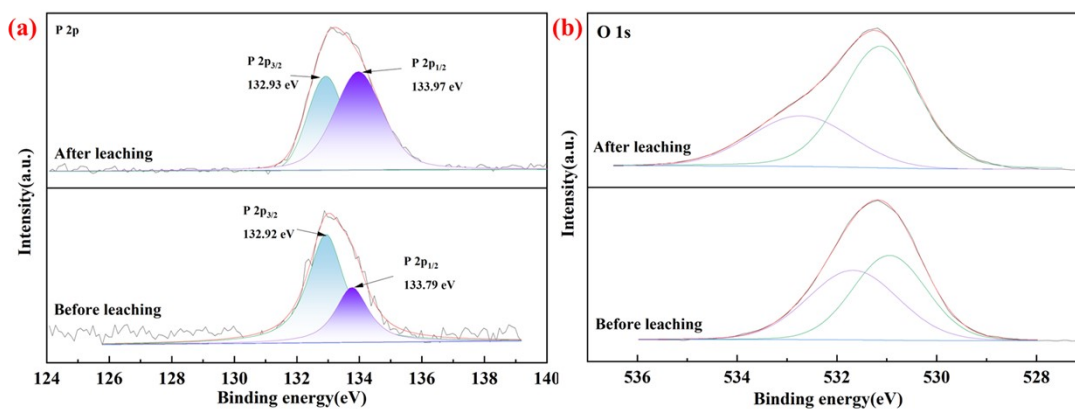

Figure S2. XPS spectra of (a) P 2p, and (b) O 1s for activated materials and leached residue (mass ratio of Ca(ClO)<sub>2</sub>/LiFePO<sub>4</sub>=1.2 g/g, 400 rpm and 30 min)

## Table S2

Table S2. Purity of the LiCl standards and the products in our study.

| Element | Industrial grade LiCl | In our study |
|---------|-----------------------|--------------|
| Li      | 98.67% <sup>a</sup>   | 98.71%       |
| Ca      | 1000 <sup>b</sup>     | 987          |
| Fe      | 1000                  | 852          |
| Na      | 500                   | 450          |
| Mg      | 10000                 |              |

Note: <sup>a</sup> Concentration in terms of mg metal/kg Li, ppm.

<sup>b</sup> Grams of Li/total grams of metal, excluding chlorides.

## Text S1

### Text S1. Economic analysis and detailed information

The spent LiFePO<sub>4</sub> batteries used in this study was obtained from Mizuda Group Co., Ltd. in Zhejiang Province, China. The spent LiFePO<sub>4</sub> batteries was disassembled, crushed and sorted to obtain 50 g of aluminum foil, 50 g of copper foil, 175 g of steel shell, 275 g of organic diaphragm and electrolyte, and 450 g of LiFePO<sub>4</sub> powder. Their economic values were calculated according to the economic analysis approach.

Process 1: According to the experimental design, 450 g of Ca(ClO)<sub>2</sub> was added to the LiFePO<sub>4</sub> powder for mechanical activation in a ball mill. After reacting for 30 min, 22.5 L of deionized water was added for the water leaching reaction. After the reaction, 408.5 g of leached residue and 21.38 L of leachate were obtained by vacuum filtration. The leachate was prepared by adding 293.2 g of ammonia carbonate to remove the impurity Ca, yielding 299.3 g of calcium carbonate. The Li-rich purification was evaporated/crystallized to obtain 110.66g of LiCl.

Process 2: According to the experimental design, 540 g of Ca(ClO)<sub>2</sub> was added to the LiFePO<sub>4</sub> powder for hydrometallurgical enhanced leaching. After reacting for 50 min, 408.5 g of FePO<sub>4</sub>, 503.3g CaSO<sub>4</sub> and 3.85 L of leachate were obtained by vacuum filtration. The leachate was evaporated/crystallized to obtain 116.95g of LiCl crystalline matter.

Recently, the price of lithium salt has been fluctuating, and to determine the economic benefits and the inputs and outputs for different technical routes, the prices of the main reagents and products were normalized with the market price prevailing on January 31, 2023, as shown in Table S3. The exchange rate was calculated at 1 CNY = 0.14 USD. In addition, the powers of both the muffle furnace and the ball mill used in this paper were 3 kW. The energy costs, such as the electricity used in the comparative technology process, were based on the original literature, while this paper used the industrial electricity price of 0.8 RMB/kWh in Guangzhou, Guangdong Province, China.

### Table S3

Table S3. Unit prices of the main chemical reagents/products.

| Reagent/product (industrial grade purity)       | Unit price (\$/t) |
|-------------------------------------------------|-------------------|
| Ca(ClO) <sub>2</sub>                            | 850               |
| H <sub>2</sub> SO <sub>4</sub>                  | 42                |
| FePO <sub>4</sub> /C                            | 7700              |
| FePO <sub>4</sub>                               | 2870              |
| (NH <sub>4</sub> ) <sub>2</sub> CO <sub>3</sub> | 280               |
| CaSO <sub>4</sub>                               | 126               |
| CaCO <sub>3</sub>                               | 70                |
| LiCl                                            | 42000             |

Note: Data source reference: <https://www.100ppi.com>, <https://b2b.baidu.com>, <https://p4psearch.1688.com>, <https://www.chemsrc.com>.

Figure S3

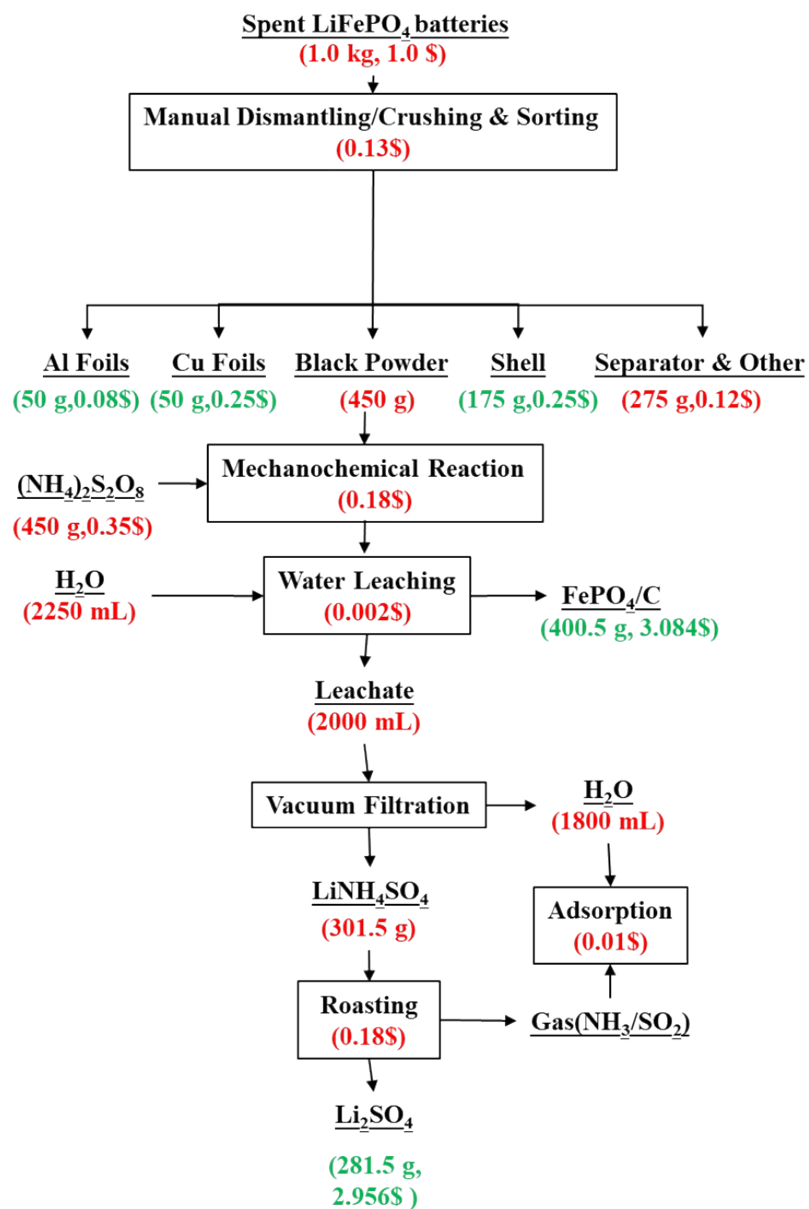

Figure S3. The benefits of recovering 1.0 kg spent LiFePO4 batteries in the persulfate system.
